# Supplementary material for: Self-healing, antibiofouling and anticorrosion properties enabled by designing polymers with dynamic covalent bonds and responsive linkages
Source: Royal Society of Chemistry journal article supplement (doi:10.1039/d4tb00736k), 2024-01-01
Supplement: d4tb00736k1.pdf [file d4tb00736k1.pdf]

## Electronic Supplementary Information

# Self-healing, antibiofouling and anticorrosion properties enabled by designing polymers with dynamic covalent bonds and responsive linkages

*Jenpob Sokjorhor,<sup>a</sup> Tiwa Yimyai,<sup>b</sup> Rawewan Thiramanas,<sup>c</sup> and Daniel Crespy<sup>a\*</sup>*

<sup>a</sup> Department of Materials Science and Engineering, School of Molecular Science and Engineering, Vidyasirimedhi Institute of Science and Technology (VISTEC) Rayong 21210, Thailand

<sup>b</sup> Department of Chemical and Biomolecular Engineering, School of Energy Science and Engineering, Vidyasirimedhi Institute of Science and Technology (VISTEC) Rayong 21210, Thailand

<sup>c</sup> National Nanotechnology Center (NANOTEC), National Science and Technology Development Agency (NSTDA), Pathum Thani 12120, Thailand

### **Corresponding Author**

\* E-mail: [daniel.crespy@vistec.ac.th](mailto:daniel.crespy@vistec.ac.th) (D. Crespy)

**Table S1.** Amounts of polymers and weight ratios of total disulfide bonds (S-S) of MBTS<sub>2</sub>MA units in PTM and HEDS units in PUDS compared with total weight of solvent (DMSO-d<sub>6</sub> and CDCl<sub>3</sub>).

| Entry                        | PTM/PUDS<br>(wt%) | PTM<br>(mg) | PUDS<br>(mg) | $mS-S_{(PTM+PUDS)}/m(DMSO-d_6 + CDCl_3)$<br>(wt%) |
|------------------------------|-------------------|-------------|--------------|---------------------------------------------------|
| [PTM] + [PUDS]<br>= constant | 10                | 2.33        | 21.00        | 0.17                                              |
|                              | 20                | 4.67        | 18.66        | 0.16                                              |
|                              | 30                | 7.00        | 16.33        | 0.15                                              |
| [PTM] = constant             | 10                | 7.00        | 62.99        | 0.51                                              |
|                              | 20                | 7.00        | 28.00        | 0.24                                              |
|                              | 30                | 7.00        | 16.33        | 0.15                                              |

**Table S2.** Comparison of adhesion strengths of various polyurethane coatings for anticorrosion on steel substrates.

| Coating                                                               | Adhesion strength<br>(MPa) | Ref.      |
|-----------------------------------------------------------------------|----------------------------|-----------|
| Blend of PTM and PUDS                                                 | 3.68 – 6.48                | This work |
| Carbon nanotubes/TiO <sub>2</sub> /polyurethane                       | 1.55                       | 1         |
| Polyurethane with dopamine and silane pendant groups                  | 1.70                       | 2         |
| Polyurethane based on acrylic polyol/hexamethylene diisocyanate       | 2.70                       | 3         |
| Polyurethane matrix                                                   | 4.58                       | 4         |
| Polyurethane containing micro-powdered cellulose                      | 5.18                       |           |
| Polyurethane containing nanocrystalline cellulose                     | 6.51                       |           |
| Multiwalled carbon nanotube/waterborne polyurethane                   | 5.72                       | 5         |
| Polyurethane                                                          | 7.60                       | 6         |
| Polyurethane with functionalized CeO <sub>2</sub> nanoparticles       | 9.70                       |           |
| Waterborne polyurethane containing graphene oxide                     | 8.76                       | 7         |
| MXene/CeO <sub>2</sub> polyurethane composite                         | 8.90                       | 8         |
| Polyurethane containing functionalized TiO <sub>2</sub> nanoparticles | 11.2                       | 9         |

**Table S3.** Corrosion current ( $I_{corr}$ ), polarization resistance ( $R_p$ ) and corrosion rate (CR) of steel substrates and steel substrates coated with PUDS or blends of PTM and PUDS were measured by potentiodynamic polarization in a 3.5 wt% NaCl aqueous solution.

| Entry           | $I_{corr}$<br>(A cm <sup>-2</sup> ) | $R_p$<br>( $\Omega$ )      | CR<br>(mm year <sup>-1</sup> ) |
|-----------------|-------------------------------------|----------------------------|--------------------------------|
| Bare steel      | $3.36 \pm 0.11 \cdot 10^{-6}$       | $4.01 \pm 0.97 \cdot 10^3$ | $3.93 \pm 0.13 \cdot 10^{-2}$  |
| PUDS            | $1.27 \pm 0.79 \cdot 10^{-7}$       | $1.52 \pm 0.82 \cdot 10^6$ | $1.48 \pm 0.93 \cdot 10^{-3}$  |
| 10 wt% PTM/PUDS | $5.29 \pm 0.42 \cdot 10^{-9}$       | $1.87 \pm 0.62 \cdot 10^7$ | $6.18 \pm 0.49 \cdot 10^{-5}$  |
| 20 wt% PTM/PUDS | $3.10 \pm 0.46 \cdot 10^{-9}$       | $3.51 \pm 1.96 \cdot 10^7$ | $3.62 \pm 0.54 \cdot 10^{-5}$  |
| 30 wt% PTM/PUDS | $2.17 \pm 0.87 \cdot 10^{-9}$       | $4.95 \pm 2.29 \cdot 10^7$ | $2.54 \pm 1.02 \cdot 10^{-5}$  |

**Table S4.** Corrosion potential ( $E_{corr}$ ) and corrosion current density ( $I_{corr}$ ) for the corrosion of steel coated with various polyurethane coatings immersed in a 3.5 wt% NaCl aqueous solutions.

| Coating                                                                  | $E_{corr}$<br>(mV) | $I_{corr}$<br>(A cm <sup>-2</sup> ) | CR<br>(mm year <sup>-1</sup> ) | Thickness<br>( $\mu$ m) | Ref.      |
|--------------------------------------------------------------------------|--------------------|-------------------------------------|--------------------------------|-------------------------|-----------|
| Blend of PTM and PUDS                                                    | -77                | $2.17 \cdot 10^{-9}$                | $2.54 \cdot 10^{-5}$           | ~ 40                    | This work |
| Waterborne polyurethane containing ZnO                                   | -604               | $7.84 \cdot 10^{-7}$                | $1.00 \cdot 10^{-2}$           | ~ 20                    | 10        |
| Polyurethane containing multi-walled carbon nanotubes                    | n.a.               | $4.39 \cdot 10^{-6}$                | $5.17 \cdot 10^{-2}$           | ~ 63                    | 11        |
| Waterborne polyurethane containing montmorillonite                       | -564               | $6.04 \cdot 10^{-6}$                | n.a.                           | ~ 100                   | 12        |
| Waterborne polyurethane                                                  | -667               | $8.41 \cdot 10^{-6}$                |                                |                         |           |
| Waterborne polyurethane containing functionalized Ce-montmorillonite     | -475               | $1.53 \cdot 10^{-7}$                |                                |                         |           |
| Waterborne polyurethane containing functionalized graphene oxide and ZnO | -482               | $1.90 \cdot 10^{-7}$                | $2.00 \cdot 10^{-3}$           | ~ 20                    | 13        |
| Waterborne polyurethane containing functionalized carbon black and ZnO   | -588               | $9.10 \cdot 10^{-7}$                | $1.10 \cdot 10^{-2}$           |                         |           |
| Waterborne polyurethane                                                  | -320               | $1.99 \cdot 10^{-7}$                | n.a.                           | ~ 50                    | 14        |
| Polyurethane containing graphene oxide                                   | -230               | $3.15 \cdot 10^{-8}$                |                                |                         |           |
| Polyurethane containing functionalized graphene oxide                    | -180               | $3.16 \cdot 10^{-9}$                |                                |                         |           |
| Polyurethane containing ZnO and multiwalled carbon nanotube              | -357               | $2.44 \cdot 10^{-7}$                | $1.11 \cdot 10^{-1}$           | ~ 35                    | 15        |
| Polyurethane containing ZnO and reduced graphene oxide                   | -326               | $4.64 \cdot 10^{-8}$                | $2.11 \cdot 10^{-2}$           |                         |           |
| Polyurethane containing SiO <sub>2</sub> nanoparticles                   | -540               | $3.03 \cdot 10^{-7}$                | $1.27 \cdot 10^{-4}$           | ~ 40                    | 16        |
| Polyurethane                                                             | -560               | $5.62 \cdot 10^{-7}$                | $3.12 \cdot 10^{-4}$           |                         |           |
| Polydimethylsiloxane-based polyurethane                                  | -614               | $7.50 \cdot 10^{-8}$                | $8.83 \cdot 10^{-3}$           | ~ 10                    | 17        |
| Polydimethylsiloxane-based polyurethane containing ZnO nanoparticles     | -487               | $7.00 \cdot 10^{-9}$                | $8.24 \cdot 10^{-4}$           |                         |           |
| Multiwalled carbon nanotube/waterborne polyurethane                      | n.a.               | $2.62 \cdot 10^{-9}$                | $3.00 \cdot 10^{-5}$           | ~ 85                    | 5         |
| Polyurethane                                                             | -469               | $6.65 \cdot 10^{-9}$                | $7.72 \cdot 10^{-5}$           | n.a.                    | 18        |
| Poly(urethane-co-pyrrole)                                                | -91                | $8.00 \cdot 10^{-9}$                | n.a.                           | ~ 10                    | 19        |

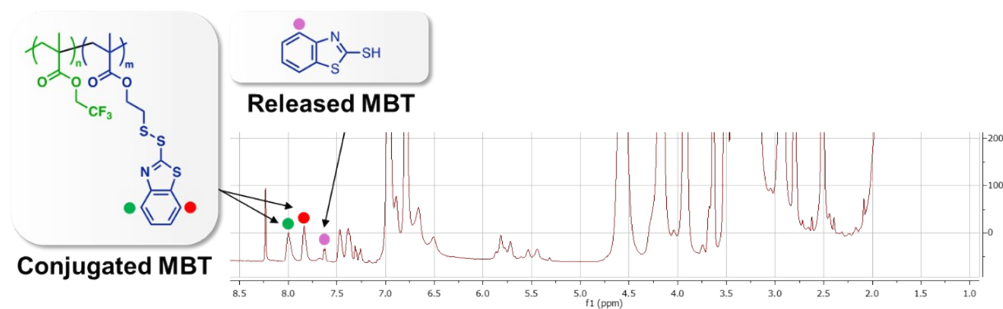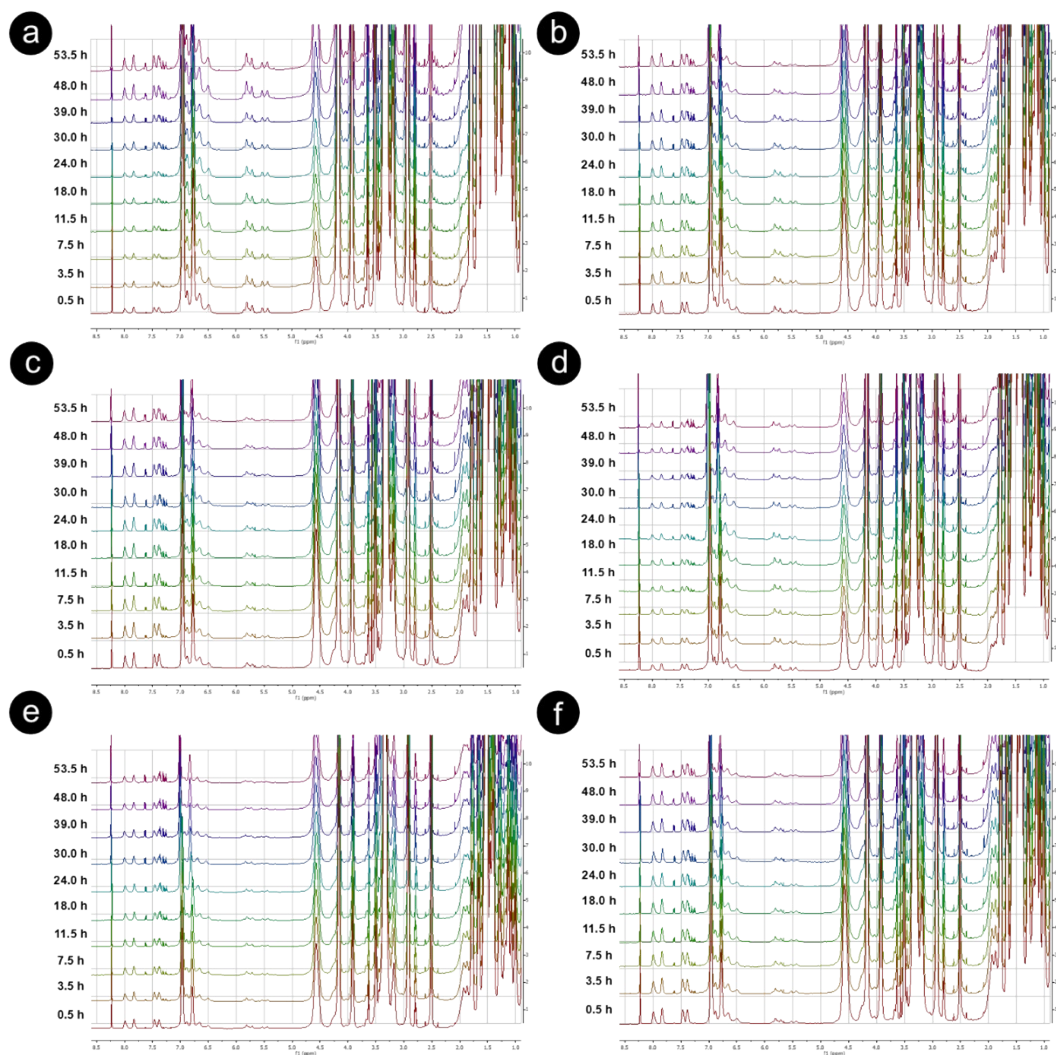

**Figure S1.** Temporal release of 2-mercaptobenzothiazole (MBT) from a solution of (a) 10, (b) 20, and (c) 30 wt% PTM/PUDS while keeping the concentration of polymer blends constant or from a solution of (d) 10, (e) 20, and (f) 30 wt% PTM/PUDS while keeping the concentration of PTM constant determined by  $^1\text{H}$  NMR spectroscopy in a mixture of DMSO- $d_6$  and  $\text{CDCl}_3$  (80/20 v/v) at 70  $^\circ\text{C}$ .

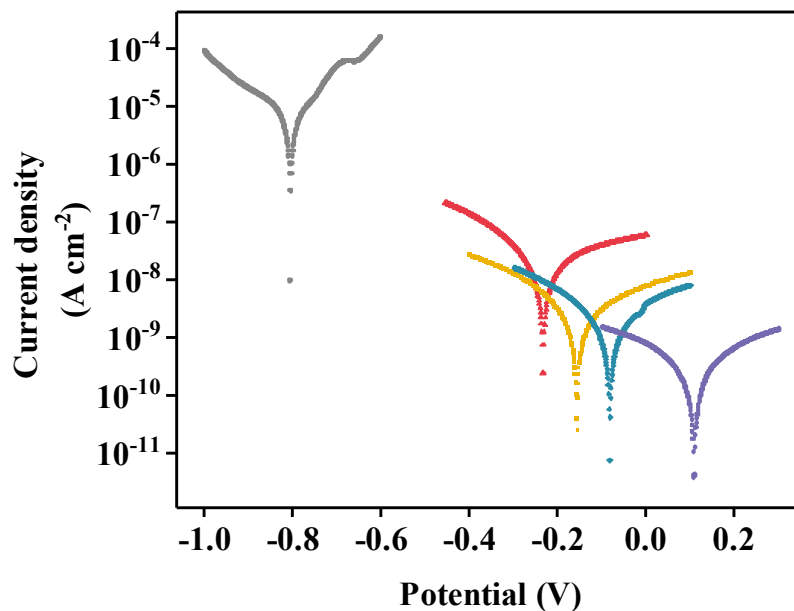

**Figure S2.** Potentiodynamic polarization curves of steel substrates and steel substrates coated with PUDS or blends of PTM and PUDS measured in a 3.5 wt% NaCl aqueous solution (●, bare steel; ▲, PUDS; ■, 10 wt% PTM/PUDS; ◆, 20 wt% PTM/PUDS; ●, 30 wt% PTM/PUDS).

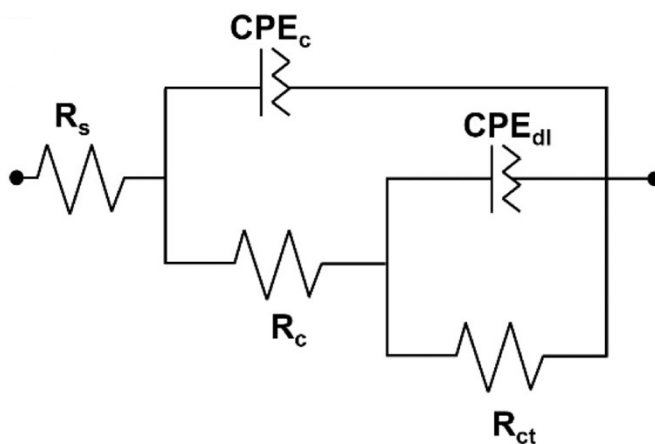

**Figure S3.** Equivalent circuits for modeling the data from EIS.  $R_c$ ,  $R_{ct}$ ,  $CPE_c$ , and  $CPE_{dl}$  are the coating resistance of the steel substrates, charge transfer resistance of the steel substrates, constant phase element of coating capacitance, and constant phase element of double-layer capacitance, respectively.

**Table S5.** Coating resistance ( $R_c$ ), constant phase element of coating capacitance ( $CPE_c$ ), charge transfer resistance ( $R_{ct}$ ), and constant phase element of double-layer capacitance ( $CPE_{dl}$ ) of steel substrates and steel substrates coated with PUDS or blends of PTM and PUDS were measured by electrochemical impedance spectroscopy in a 3.5 wt% NaCl aqueous solution.

| Entry           | $R_c$<br>( $\Omega \text{ cm}^2$ ) | $CPE_c$<br>( $\text{F cm}^{-2}$ ) | $R_{ct}$<br>( $\Omega \text{ cm}^2$ ) | $CPE_{dl}$<br>( $\text{F cm}^{-2}$ ) |
|-----------------|------------------------------------|-----------------------------------|---------------------------------------|--------------------------------------|
| PUDS            | $2.28 \pm 0.68 \cdot 10^5$         | $1.09 \pm 0.17 \cdot 10^{-10}$    | $4.17 \pm 0.59 \cdot 10^7$            | $6.21 \pm 1.40 \cdot 10^{-10}$       |
| 10 wt% PTM/PUDS | $2.33 \pm 0.41 \cdot 10^5$         | $0.86 \pm 0.02 \cdot 10^{-10}$    | $4.44 \pm 1.10 \cdot 10^7$            | $5.76 \pm 0.31 \cdot 10^{-10}$       |
| 20 wt% PTM/PUDS | $2.61 \pm 0.20 \cdot 10^5$         | $0.81 \pm 0.07 \cdot 10^{-10}$    | $6.01 \pm 0.60 \cdot 10^7$            | $5.51 \pm 0.78 \cdot 10^{-10}$       |
| 30 wt% PTM/PUDS | $2.63 \pm 0.49 \cdot 10^5$         | $0.80 \pm 0.07 \cdot 10^{-10}$    | $6.55 \pm 2.33 \cdot 10^7$            | $6.07 \pm 1.13 \cdot 10^{-10}$       |

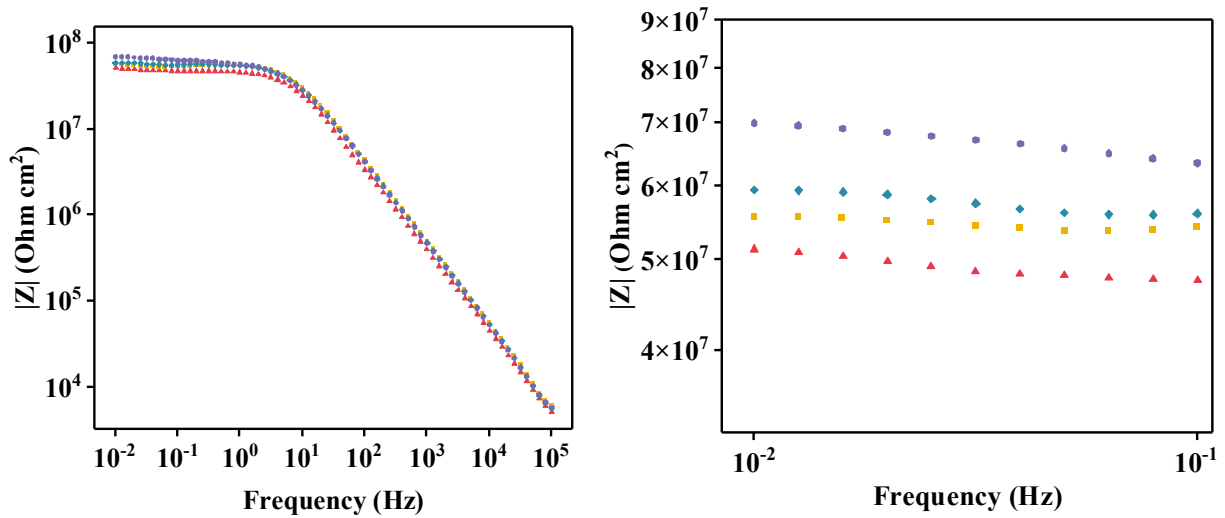

**Figure S4.** Bode plots of steel substrates and steel substrates coated with PUDS or blends of PTM and PUDS in a 3.5 wt% NaCl aqueous solution ( $\blacktriangle$ , PUDS;  $\blacksquare$ , 10 wt% PTM/PUDS;  $\blacklozenge$ , 20 wt% PTM/PUDS;  $\bullet$ , 30 wt% PTM/PUDS).

**Table S6.** Impedance at 0.01 Hz ( $|Z|_{0.01}$ ) of steel coated with various polyurethane coatings immersed in a 3.5 wt% NaCl aqueous solution.

| Coating                                                             | $ Z _{0.01}$<br>( $\Omega \text{ cm}^2$ ) | Thickness<br>( $\mu\text{m}$ ) | Ref.      |
|---------------------------------------------------------------------|-------------------------------------------|--------------------------------|-----------|
| Blend of PTM and PUDS                                               | $5.58 \cdot 10^7$                         | ~ 40                           | This work |
| Polyurethane containing functionalized $\text{TiO}_2$ nanoparticles | ~ $10^6$                                  | n.a.                           | 9         |
| Epoxy acrylate polyurethane                                         | $4.49 \cdot 10^6$                         | n.a.                           | 20        |
| Waterborne polyurethane                                             | $7.79 \cdot 10^6$                         | ~ 40                           | 7         |
| Waterborne polyurethane containing graphene oxide                   | $1.15 \cdot 10^7$                         | n.a.                           | 21        |
| Waterborne polyurethane containing functionalized graphene oxide    | $1.81 \cdot 10^7$                         |                                |           |
| Waterborne polyurethane                                             | $1.52 \cdot 10^7$                         | ~ 55                           | 22        |
| Waterborne polyurethane s containing graphene oxide                 | $6.95 \cdot 10^7$                         |                                |           |
| Waterborne polyurethane                                             | $1.74 \cdot 10^7$                         | ~ 100                          | 12        |
| Waterborne polyurethane containing Ce-montmorillonite               | $4.10 \cdot 10^8$                         |                                |           |
| Polyurethane containing ZnO and multiwalled carbon nanotube         | $5.68 \cdot 10^8$                         | ~ 35                           | 15        |

**Table S7.** Comparison of the self-healing efficiency of various polyurethane coatings for anticorrosion.

| Coating                                                        | Healing condition        |         | Measured value                                   | Healing efficiency (%) | Thickness ( $\mu\text{m}$ ) | Ref.      |
|----------------------------------------------------------------|--------------------------|---------|--------------------------------------------------|------------------------|-----------------------------|-----------|
|                                                                | $T$ ( $^\circ\text{C}$ ) | $t$ (h) |                                                  |                        |                             |           |
| Blend of PTM and PUDS                                          | 70                       | 48      | integrals of Bode plots from $10^{-2} - 10^5$ Hz | ~ 95                   | ~ 40                        | This work |
| Polyurethane with dopamine and silane pendant groups           | 25                       | 24      | tensile strength                                 | ~ 64                   | ~ 500                       | 2         |
| Polyurethane containing microcapsules loaded with an inhibitor | 25                       | 2       | polarization resistance                          | ~ 77                   | ~ 300                       | 23        |
| Polyurethane with phenanthroline side chains                   | 25                       | 1.5     | tensile strength                                 | ~ 88                   | ~ 80                        | 24        |
| Polyurethane with functionalized $\text{CeO}_2$ nanoparticles  | 120                      | 2       | tensile strength                                 | ~ 90                   | ~ 500                       | 6         |

**Table S7.** Comparison of the self-healing efficiency of various polyurethane coatings for anticorrosion (Continuous).

| Coating                                                               | Healing condition          |           | Measured value               | Healing efficiency (%) | Thickness ( $\mu\text{m}$ ) | Ref. |
|-----------------------------------------------------------------------|----------------------------|-----------|------------------------------|------------------------|-----------------------------|------|
|                                                                       | $T$ ( $^{\circ}\text{C}$ ) | $t$ (h)   |                              |                        |                             |      |
| Waterborne polyurethane containing functionalized graphene oxide      | 125                        | (5 min)   | impedance modulus at 0.01 Hz | ~ 91                   | n.a.                        | 25   |
| Polyurethane containing functionalized silica nanoparticles           | 80                         | 12        | tensile strength             | ~ 95                   | n.a.                        | 26   |
| Polyurethane containing graphene oxide microcapsules with linseed oil | 25                         | (15 days) | crack width                  | ~ 100                  | ~ 500                       | 27   |

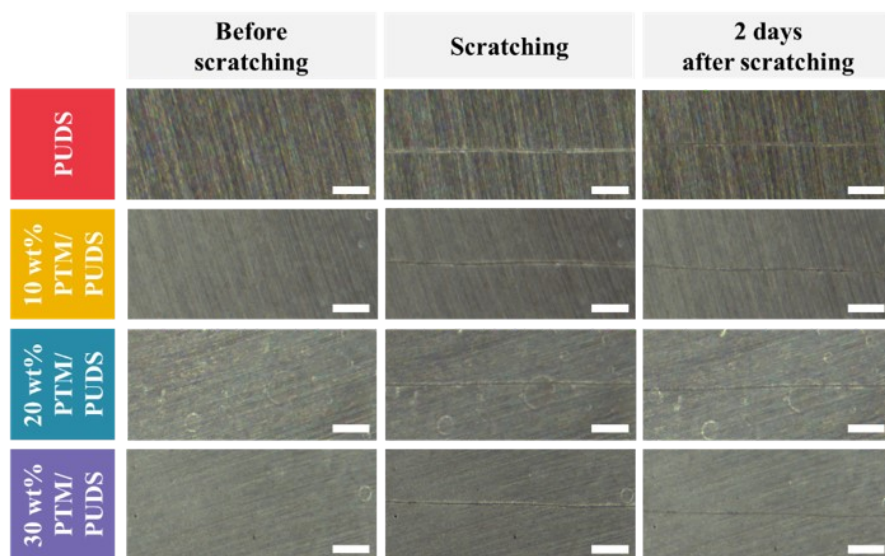

**Figure S5.** Photographs of steel substrates coated with PUDS or blends of PTM and PUDS after scratching (length = 5.0 mm, width = 0.4 mm) by a razor blade and healing at 70  $^{\circ}\text{C}$  for 2 days. Scale bars represent 1 mm.



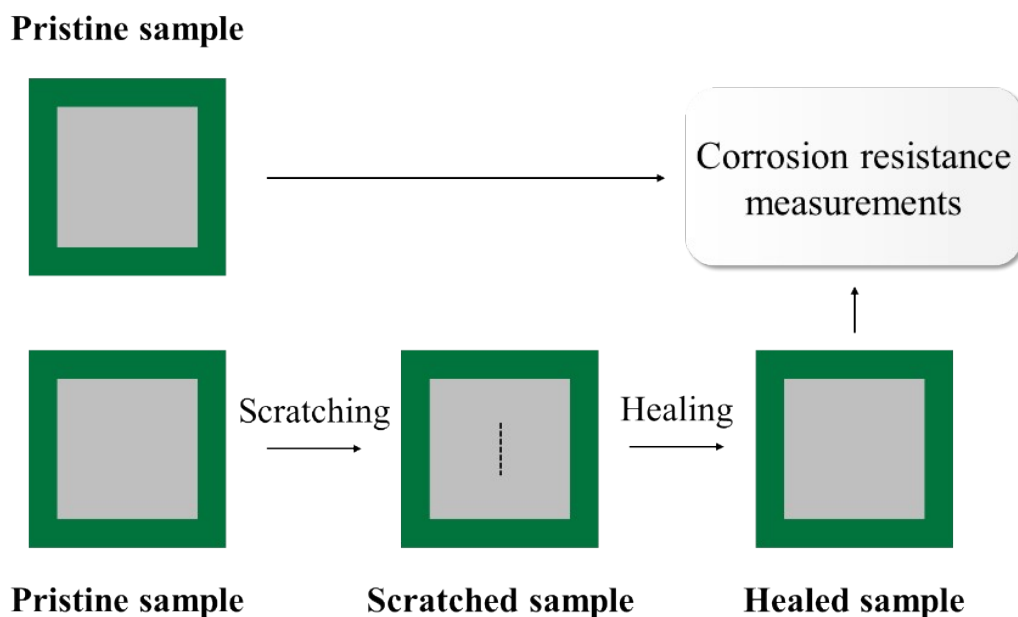

**Figure S6.** Schematic showing the preparation of pristine samples and scratched samples after healing at 70 °C for 2 days (length of scratch = 5.0 mm, width = 0.4 mm) for corrosion resistance measurement.

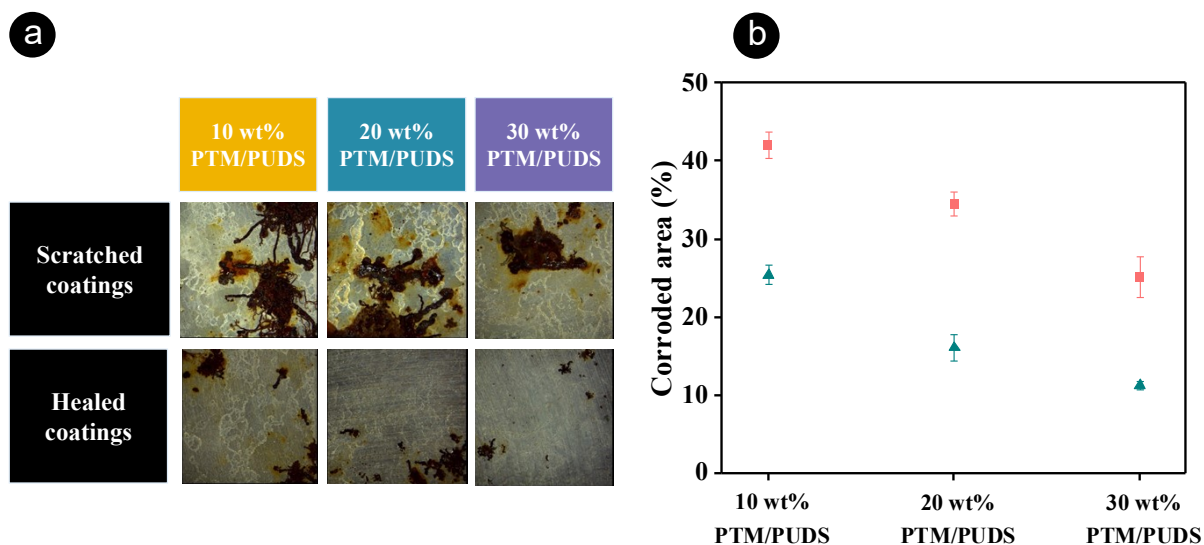

**Figure S7.** a) Photographs and b) calculated corroded areas of scratched (■) /healed (▲) coatings with 10, 20, and 30 wt% PTM/PUDS on steel substrates (thickness ~ 40 μm) after 48 h in a salt spray test at 35 °C.

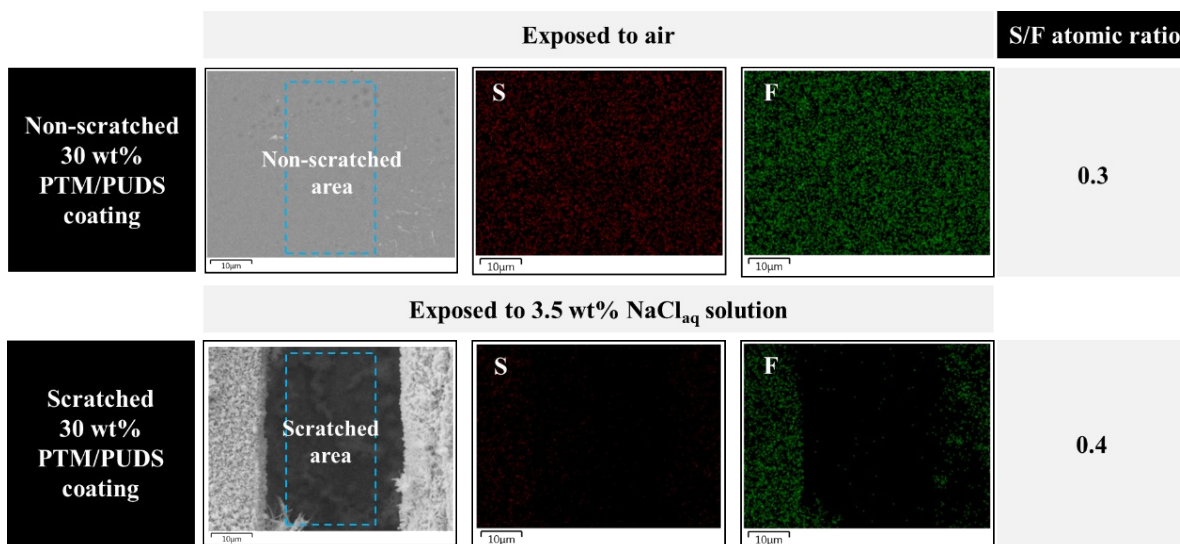

**Figure S8.** Energy-dispersive X-ray spectroscopy elemental mapping images and S/F atomic ratios of non-scratched and scratched 30 wt% PTM/PUDS coatings on steel substrates after exposure to 100  $\mu\text{L}$  of 3.5 wt% NaCl aqueous solution after 24 h at 25  $^{\circ}\text{C}$ .

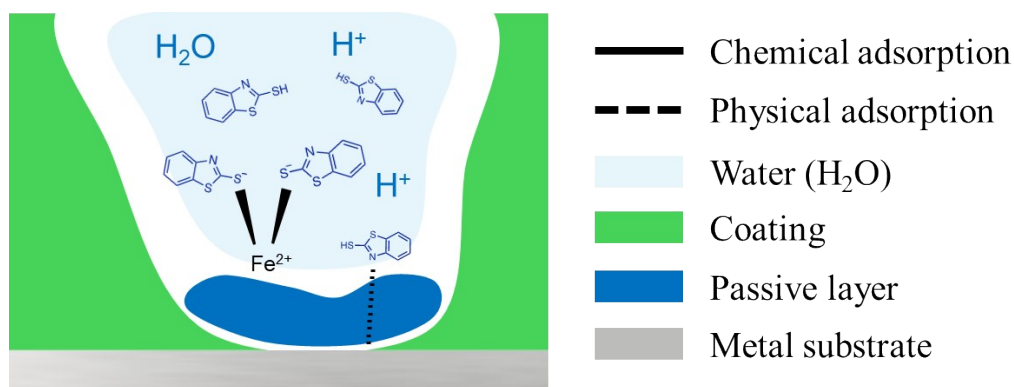

**Figure S9.** Schematic showing the mechanism of inhibiting corrosion reactions via the formation of passive layers.

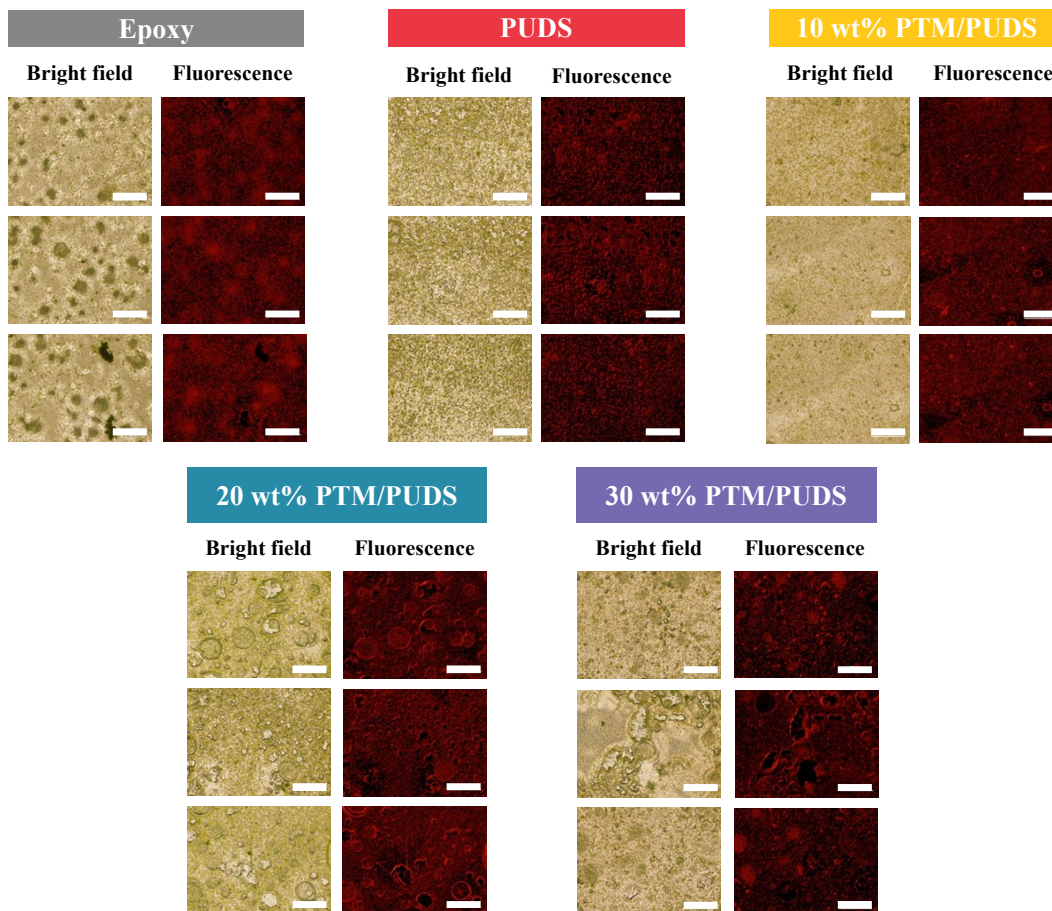

**Figure S10.** Photographs of coatings of epoxy, PUDS, or blends of PTM and PUDS on glass substrates taken with a bright field and fluorescence microscope after immersion for 57 days at 28 °C in a solution containing the unicellular microalgae, *Chlorella ellipsoidea*.

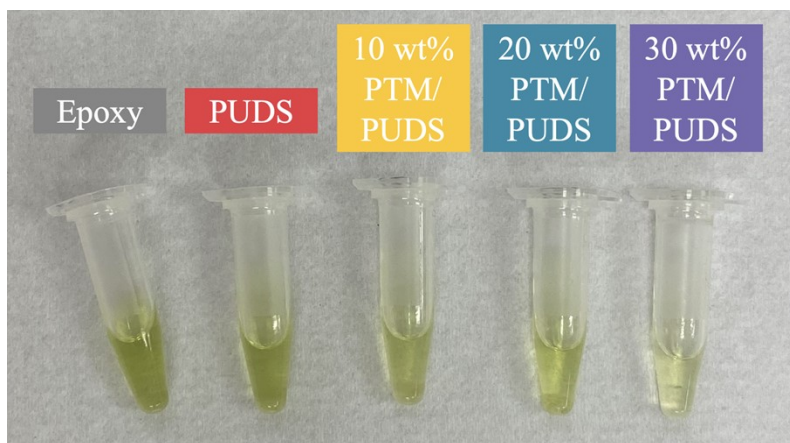

**Figure S11.** Photographs of DMF solutions used for extracting chlorophyll from coatings of epoxy, PUDS, and blends of PTM and PUDS on glass substrates.

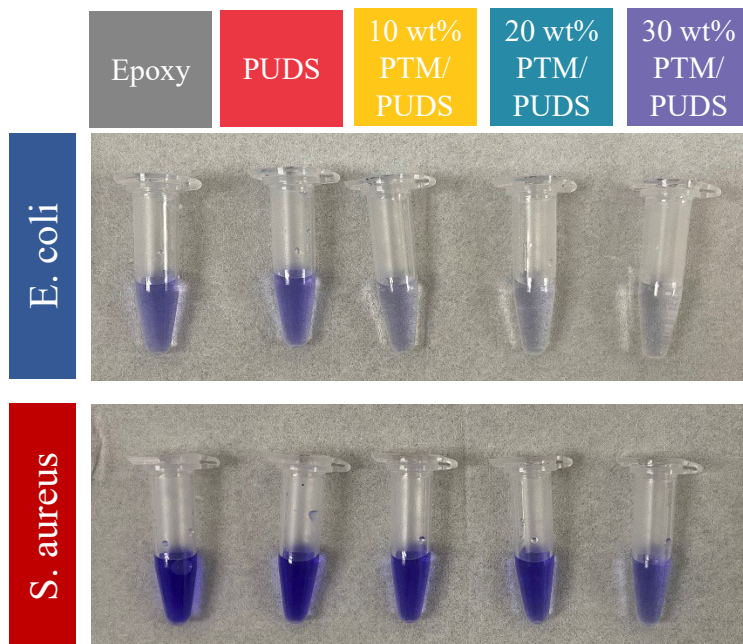

**Figure S12.** Photographs of crystal violet solutions used for extracting bacterial, *Escherichia coli* (*E. coli*) and *Staphylococcus aureus* (*S. aureus*), from coatings of epoxy, PUDS, and blends of PTM and PUDS on glass substrates.

## References

1. Q. X. Nguyen, T. T. Nguyen, N. M. Pham, T. T. Khong, T. M. Cao and V. V. Pham, *Prog. Org. Coat.*, 2022, **167**, 106838.
2. P. Hu, R. Xie, Q. Xie, C. Ma and G. Zhang, *J. Chem. Eng.*, 2022, **449**, 137875.
3. E. Abil and R. Arefinia, *Prog. Org. Coat.*, 2022, **172**, 107067.
4. M. Abd El-Fattah, A. M. A. Hasan, M. Keshawy, A. M. El Saeed and O. M. Aboelenien, *Carbohydr. Polym.*, 2018, **183**, 311-318.
5. F. Wang, J. Ci and J. Fan, *Polymers*, 2022, **14**.
6. H. Wang, J. Xu, X. Du, Z. Du, X. Cheng and H. Wang, *Compos. B. Eng.*, 2021, **225**, 109273.
7. Z. Zhao, L. Guo, L. Feng, H. Lu, Y. Xu, J. Wang, B. Xiang and X. Zou, *Eur. Polym. J.*, 2019, **120**, 109249.
8. H. Wang, J. Xu, X. Du, H. Wang, X. Cheng and Z. Du, *Prog. Org. Coat.*, 2022, **164**, 106672.
9. S. S. Chandraraj and J. R. Xavier, *J. Mater. Sci.*, 2022, **57**, 13362-13384.
10. G. Christopher, M. A. Kulandainathan and G. Harichandran, *Prog. Org. Coat.*, 2016, **99**, 91-102.
11. F. Wang, L. Feng and G. Li, *Polymers*, 2018, **10**.
12. S. Li, S. Wang, X. Du, H. Wang, X. Cheng and Z. Du, *Prog. Org. Coat.*, 2022, **163**, 106613.
13. G. Christopher, M. Anbu Kulandainathan and G. Harichandran, *Prog. Org. Coat.*, 2015, **89**, 199-211.
14. A. Mohammadi, M. Barikani, A. H. Doctorsafaei, A. P. Isfahani, E. Shams and B. Ghalei, *J. Chem. Eng.*, 2018, **349**, 466-480.
15. K. Rajitha, K. N. S. Mohana, M. B. Hegde, S. R. Nayak and N. K. Swamy, *FlatChem*, 2020, **24**, 100208.
16. J. Verma, A. Gupta and D. Kumar, *Prog. Org. Coat.*, 2022, **163**, 106661.
17. B. John, P. R. Rajimol, T. P. D. Rajan and S. K. Sahoo, *Surf. Coat. Technol.*, 2022, **451**.
18. T. Ghosh and N. Karak, *Prog. Org. Coat.*, 2020, **139**, 105472.
19. R. Gharibi, M. Yousefi and H. Yeganeh, *Prog. Org. Coat.*, 2013, **76**, 1454-1464.
20. Y. Ahmadi and S. Ahmad, *Prog. Org. Coat.*, 2019, **127**, 168-180.
21. F. Zhang, W. Liu, C. Liu, S. Wang, H. Shi, L. Liang and K. Pi, *Colloids Surf. A: Physicochem. Eng. Asp.*, 2021, **617**, 126390.
22. F. Zhang, S. Wang, W. Liu, H. Shi, L. Liang, C. Liu, K. Pi, W. Zhang and J. Zeng, *Colloids Surf. A: Physicochem. Eng. Asp.*, 2022, **640**, 127718.
23. W. Fan, Y. Zhang, W. Li, W. Wang, X. Zhao and L. Song, *J. Chem. Eng.*, 2019, **368**, 1033-1044.
24. C. Liu, H. Wu, Y. Qiang, H. Zhao and L. Wang, *Corros. Sci.*, 2021, **184**, 109355.
25. J. Xu, F. Gao, H. Wang, R. Dai, S. Dong and H. Wang, *Prog. Org. Coat.*, 2023, **174**, 107244.
26. H. Wang, J. Xu, H. Wang, X. Cheng, S. Wang and Z. Du, *Prog. Org. Coat.*, 2022, **167**, 106837.
27. J. Li, Q. Feng, J. Cui, Q. Yuan, H. Qiu, S. Gao and J. Yang, *Compos. Sci. Technol.*, 2017, **151**, 282-290.
